# Supplementary material
Source: MDPI journal article supplement (https://www.mdpi.com/1424-8247/14/10/1046)
Supplement: s1 [file s1]

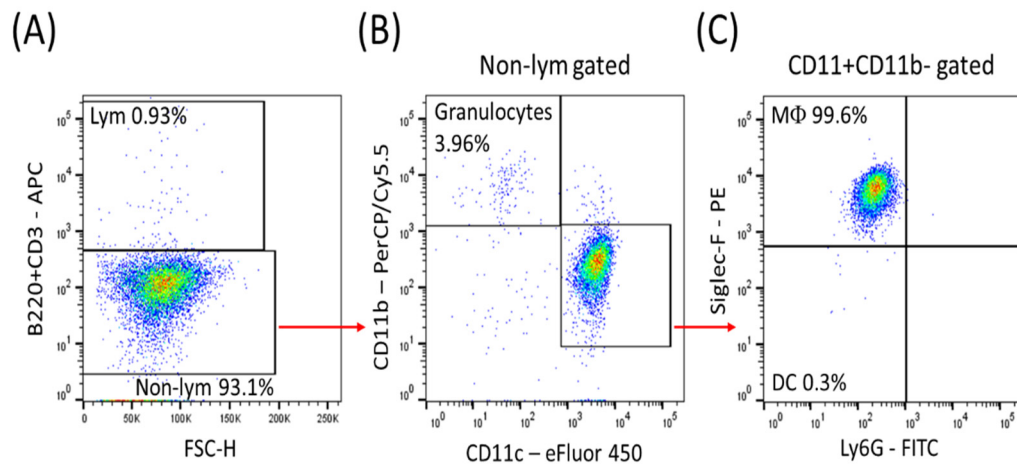

**Supplemental Figure S1.** Flow cytometric analysis for immune cell subset identification in BALF. Representative dot plots from a LPS-tread mouse are shown for gating for (A) lymphocytes (Lym;  $CD3^+$  or  $B220^+$  cells) among viable cells. (B) Granulocytes ( $CD11c^-CD11b^+$ ) are gated from non-lymphocytes. (C) Macrophages (MΦ;  $Ly6G^+Siglec-F^+$ ) or dendritic cells (DC;  $Ly6G^-Siglec-F^-$ ) are gated from  $CD11c^+CD11b^-$  cells.
